# Supplementary material
Source: PubMed Central journal article supplement (PMC10031817)
Supplement: NIHMS1878345-supplement-1.pdf [file NIHMS1878345-supplement-1.pdf]

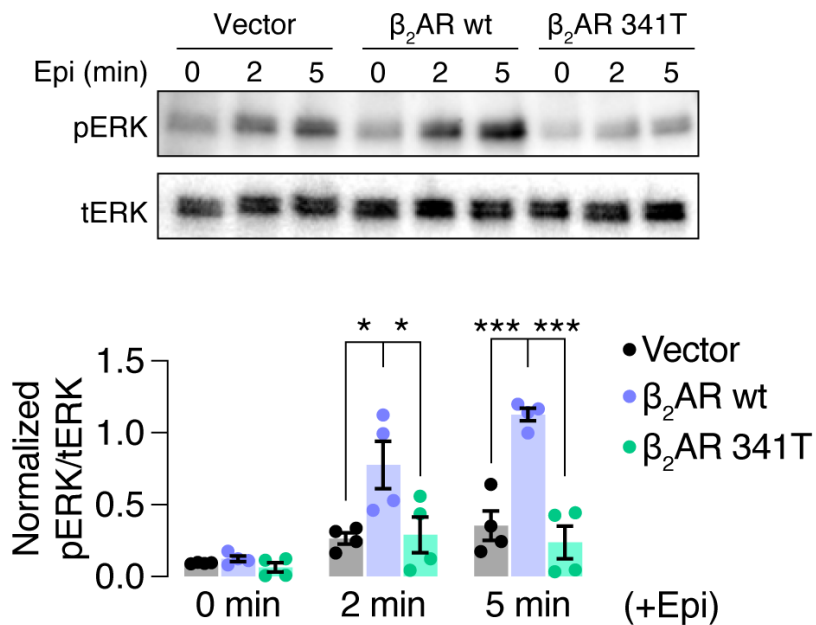

913

914 **Supplementary Figure 1. Epinephrine-induced phosphorylation of ERK at early time**  
 915 **points, regarding Extended Data Fig. 2g**

916 Western blot analysis of phospho-ERK (pERK) and total ERK (tERK) levels in HEK293T  
 917 cells expressing vector, SNAP-β<sub>2</sub>AR or SNAP-β<sub>2</sub>AR 341T following stimulation with Epi  
 918 for 0, 2, or 5 min. Representative blot (upper) and quantification of normalized pERK/tERK  
 919 levels at each time point (lower). \*P < 0.05, \*\*\*P < 0.001; ordinary one-way ANOVA  
 920 followed by Dunnett's multiple-comparisons test. Lines in scatter plots represent mean ±  
 921 SEM. Full blots are shown in Supplementary Fig. 2.

922

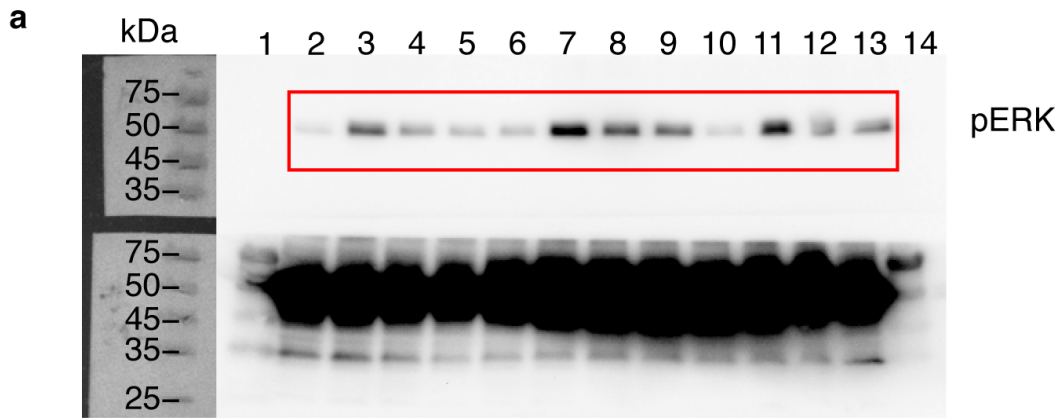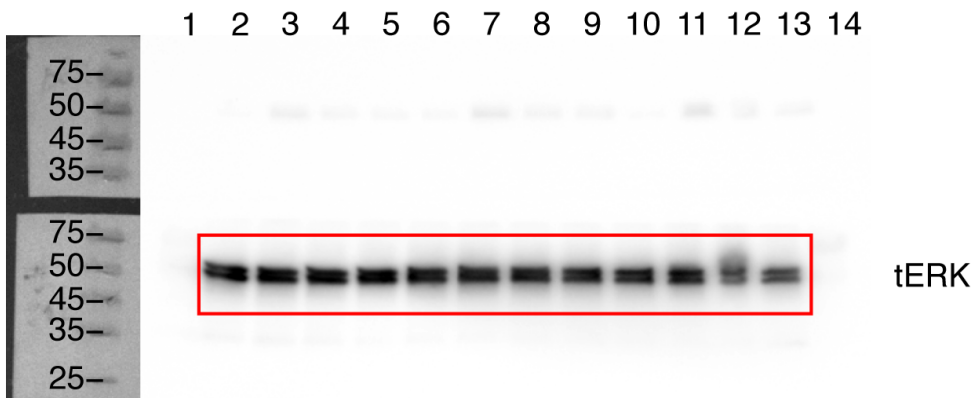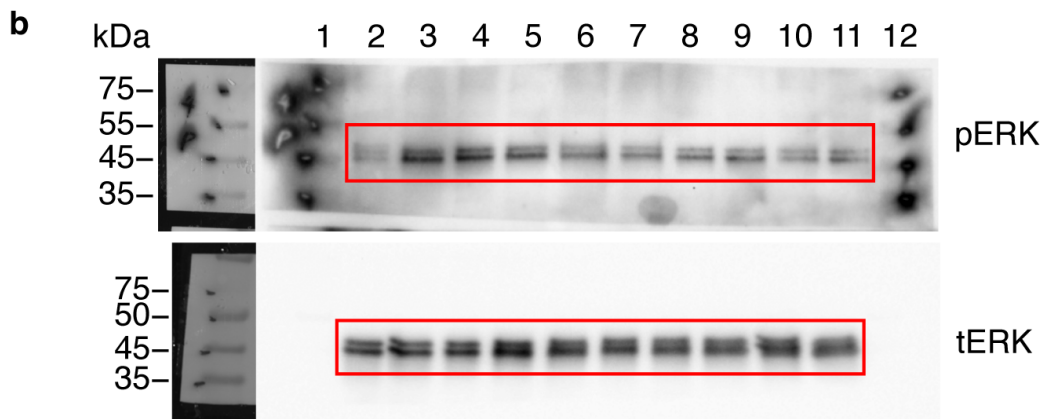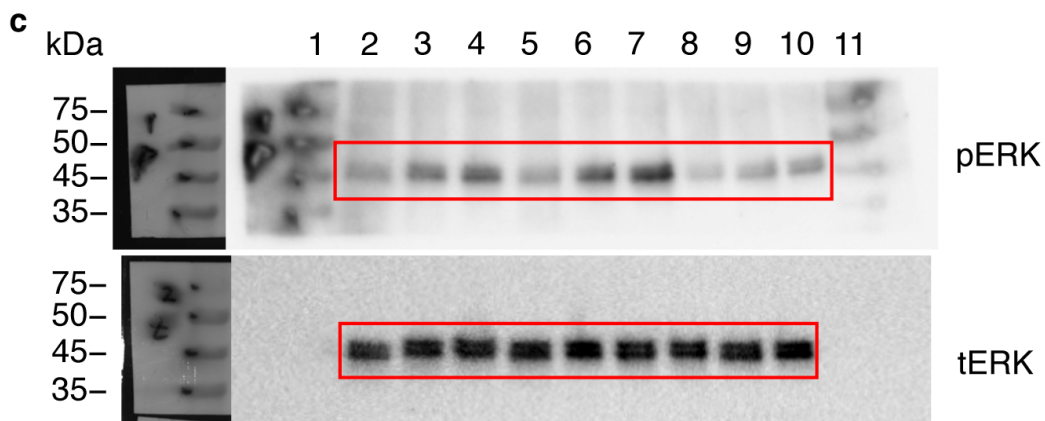

924 **Supplementary Figure 2. Uncropped western blots**

925 Western blots from HEK293T cells (a) expressing (lane 2-5) vector, (lane 6-9) SNAP- $\beta_2$ AR  
926 or (lane 10-13) SNAP- $\beta_2$ AR 341T stimulated with Epi for 0, 5, 15, 30 min. Protein ladder  
927 loaded in lanes 1 and 14 (regarding Extended Data Fig. 2g). (b) Western blots from  
928 HEK293T cells stimulated with Epi for 0, 2, 5, 15, 30 min either without (lane 2-6) or with  
929 (lane 7-11) Dyngo4a pretreatment . Protein ladder loaded in lanes 1 and 12 (regarding  
930 Extended Data Fig. 7g), (c) Western blots from HEK293T cells expressing (lane 2-4)  
931 vector, (lane 5-7) SNAP- $\beta_2$ AR or (lane 8-10) SNAP- $\beta_2$ AR 341T stimulated with Epi for 0, 2,  
932 or 5 min. Protein ladder loaded in lanes 1 and 11 (regarding Supplementary Fig. 1).  
933

| Figure                                                                             | DNA amount (ng) | DNA Ratio | List of transfected DNA                                                                                                                                                                                                                                 | siRNA                                              | Reagent ( $\mu$ l)                                  |
|------------------------------------------------------------------------------------|-----------------|-----------|---------------------------------------------------------------------------------------------------------------------------------------------------------------------------------------------------------------------------------------------------------|----------------------------------------------------|-----------------------------------------------------|
| Fig.1a, b, c, 2a, 4b, Extended Data Fig. 2b, c, 3a, b, 6a                          | 600             | 1:1:1     | Vector, SNAP- $\beta_2$ AR and biosensors                                                                                                                                                                                                               | -                                                  | Polyjet, 1.8                                        |
| Fig.2b, Extended Data Fig.3c, and 6b                                               | 600             | 1:1:1     | Vector or $\beta$ -arr2 ( $\beta$ -arr2 cDNA is resistant to siRNA targets $\beta$ -arr2), plus SNAP- $\beta_2$ AR and EKAR                                                                                                                             | 500 pmol (siARRB1, siARRB2 mixture, or siScramble) | Polyjet, 1.8                                        |
| Fig.2c, e, f, g, 3a, 4c, d, e, g Extended Data Fig.4g, h, 6c, d, 9b, c and S.Fig.1 | 600             | 1:1       | SNAP- $\beta_2$ AR-T2A-GsL/S, SNAP- $\beta_2$ AR-T2A-Nb37-FYVEx2, SNAP- $\beta_2$ AR-T2A-Nb37-NLS, SNAP- $\beta_2$ AR-T2A-Nb80-FYVEx2, SNAP- $\beta_2$ AR-T2A-Nb80-NLS, SNAP- $\beta_2$ AR-T2A-GsCT-FYVEx2 or SNAP- $\beta_2$ AR-T2A-GsCT-NLS plus EKAR | -                                                  | Polyjet, 1.8                                        |
| Fig 2d, Extended Data Fig.2d, e, and 3e, f                                         | 600             | 1:1:1     | Vector, PTX, PKI or $\beta$ -arr2, plus SNAP- $\beta_2$ AR and EKAR                                                                                                                                                                                     | -                                                  | Polyjet, 1.8                                        |
| Extended Data Fig. 2g                                                              | 50              | 1         | Vector, SNAP- $\beta_2$ AR or SNAP- $\beta_2$ AR341T                                                                                                                                                                                                    | -                                                  | Polyjet 1.5                                         |
| Fig.3c, d and Extended Data Fig.1, 5                                               | 300             | 1         | SNAP- $\beta_2$ AR, SNAP- $\beta_2$ AR-T2A-Nb37-FYVEx2 or EKAR                                                                                                                                                                                          | -                                                  | Polyjet, 0.9                                        |
| Extended Data Fig.2f                                                               | 350             | 1:6       | Vector or GPCR plus ICUE4                                                                                                                                                                                                                               | -                                                  | Polyjet, 1.8                                        |
| Fig 4f, Extended Data Fig.2a, e, 9a                                                | 50              | 1         | Vector or GPCR                                                                                                                                                                                                                                          | -                                                  | Polyjet, 1.8                                        |
| Extended Data Fig.2h and 4a-d                                                      | 600             | 1:1       | Vector or endo-Nb37 plus SNAP- $\beta_2$ AR                                                                                                                                                                                                             | -                                                  | Polyjet, 1.8                                        |
| Extended Data Fig.3f                                                               | 300             | 1         | Vector or PTX                                                                                                                                                                                                                                           | -                                                  | Polyjet, 0.9                                        |
| Extended Data Fig. 3g-i                                                            | 500             | 1:3:1     | vector or $\beta$ -arr2 plus SNAP- $\beta_2$ AR and $G\alpha_s$                                                                                                                                                                                         | 500 pmol (siARRB1, siARRB2 mixture, or siScramble) | Polyjet, 1.5                                        |
| Extended Data Fig.7a-f                                                             | 300             | 1         | EKAR                                                                                                                                                                                                                                                    | -                                                  | (a-c) Polyjet, 0.9<br>(d-f) Lipofectamine 2000, 0.9 |
| Extended Data Fig. 8                                                               | 600             | 1:1       | GPCR plus biosensors                                                                                                                                                                                                                                    | -                                                  | Polyjet, 1.8                                        |

934

935 **Supplementary Table 1. Transfection information**

936 Detailed information on transfections performed for all experiments shown in the indicated  
937 figures, including the total amount, ratio and type of DNA, siRNA and transfection  
938 reagents.

939

| Figure               | Replication for each panel                                                                                                                                                                                                                                                                                 |
|----------------------|------------------------------------------------------------------------------------------------------------------------------------------------------------------------------------------------------------------------------------------------------------------------------------------------------------|
| Fig. 1               | (a-c) 3                                                                                                                                                                                                                                                                                                    |
| Fig. 2               | (a) 2 (b-e) 3, (f) 2                                                                                                                                                                                                                                                                                       |
| Fig. 3               | (c) -Epi -endo-Nb37: 3, +Epi -endo-Nb37: 7, -Epi +endo-Nb37: 3, and +Epi +endo-Nb37: 7, respectively, (d) -Epi -endo-Nb37: 7, +Epi -endo-Nb37: 5, -Epi +endo-Nb37: 6, +Epi +endo-Nb37: 5                                                                                                                   |
| Fig. 4               | (b) Mock: 2, Epi: 4, (c): 3, (d): 2, (e): 2, (h): 3                                                                                                                                                                                                                                                        |
| Extended Data Fig. 1 | (a - d, f): 2, (e, g): 3                                                                                                                                                                                                                                                                                   |
| Extended Data Fig. 2 | (a - c), (f - i): 3, (d): 2, (e): 4                                                                                                                                                                                                                                                                        |
| Extended Data Fig. 3 | (a) NT: 3, Dyngo4a: 2, (b): 2, (c-e): 3, (f) 2 (g-i): 2                                                                                                                                                                                                                                                    |
| Extended Data Fig. 4 | (a - f): 3                                                                                                                                                                                                                                                                                                 |
| Extended Data Fig. 5 | 3                                                                                                                                                                                                                                                                                                          |
| Extended Data Fig. 6 | (a) NT: 3, Nb37: 3, Barbadin : 3, Dyngo4a: 2, (b): 3, (c) NT: 3, Barbadin:3, endo-GsCT: 2, (d) NT: 3, Barbadin: 2, endoGsCT: 2                                                                                                                                                                             |
| Extended Data Fig. 7 | (a) NT: 3, Dyngo4a: 3, (b) NT: 3, Dyngo4a, ICI118,551: 2, (c) NT: 2, Dyngo4a: 2, (d) NT: 2, Dyngo4a: 2, (e) NT: 4, Dyngo4a, ICI118,551: 2, (f) NT: 3, Dyngo4a: 3, (g) 4                                                                                                                                    |
| Extended Data Fig. 8 | (a) PM: 3, endo: 2, nuc: 2, (b) NT: 2, Barbadin: 3, Dyngo4a: 2, (c) NT: 2, Barbadin: 2, Dyngo4a: 2, (d) PM: 2, endo: 3, nuc: 3, (e) NT: 3, Barbadin: 3, Dyngo4a: 3, (f) NT: 3, Barbadin: 2, Dyngo4a: 2, (g) PM: 2, endo: 3, nuc: 2, (h) NT: 3, Barbadin: 3, Dyngo4a: 2, (i) NT: 2, Barbadin: 2, Dyngo4a: 2 |
| Extended Data Fig. 9 | (a-c) 3                                                                                                                                                                                                                                                                                                    |
| Supplementary Fig. 1 | 4                                                                                                                                                                                                                                                                                                          |

940

941 **Supplementary Table 2. Replication information for Extended Data Figures**

942 Details on the number of experimental replicates performed for all data shown in the

943 Extended Data Figures.

944

945

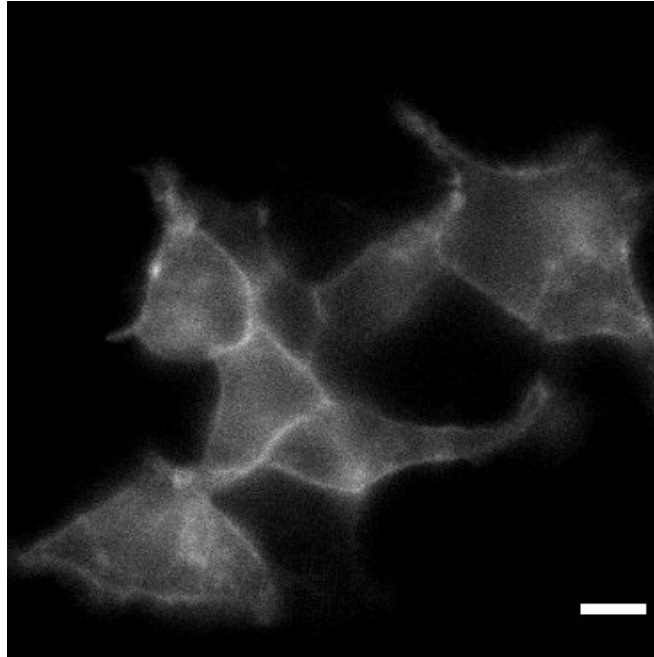

946

947 **Supplementary Movie 1. Epinephrine-induced  $\beta_2$ AR internalization**

948 Time lapse imaging of HEK293T cells expressing SNAP- $\beta_2$ AR and labeled with JF646

949 stimulated with 10  $\mu$ M epinephrine. Scale bar, 10  $\mu$ m.

950

951
